# Supplementary material for: Combining the Peptide RWQWRWQWR and an Ethanolic Extract of Bidens pilosa Enhances the Activity against Sensitive and Resistant Candida albicans and C. auris Strains
Source: MDPI journal article supplement (doi:10.3390/jof9080817), 2023-08-02
Supplement: s1 [file s1]

Supplementary Material.

# Combining the Peptide RWQWRWQWR and an Ethanolic Extract of *Bidens pilosa* Enhances the Activity against Sensitive and Resistant *Candida albicans* and *C. auris* Strains

Yerly Vargas-Casanova <sup>1</sup>, Claudia Patricia Bravo-Chaucanés <sup>1</sup>, Andrea Ximena Hernández Martínez <sup>2</sup>, Geison Modesti Costa <sup>2</sup>, Jorge Luis Contreras-Herrera <sup>3</sup>, Ricardo Fierro Medina <sup>4</sup>, Zuly Jenny Rivera-Monroy <sup>4</sup>, Javier Eduardo García-Castañeda <sup>4</sup> and Claudia Marcela Parra-Girado <sup>1,\*</sup>

<sup>1</sup> Microbiology Department, Faculty of Sciences, Pontificia Universidad Javeriana, Bogotá 110231, Colombia; y.vargasc@javeriana.edu.co (Y.V.-C.); claub06@gmail.com (C.P.B.-C.)

<sup>2</sup> Chemistry Department, Faculty of Sciences, Pontificia Universidad Javeriana, Bogotá 110231, Colombia; hernandez\_a@javeriana.edu.co (A.X.H.M.); modesticosta.g@javeriana.edu.co (G.M.C.)

<sup>3</sup> Faculty of Engineering and Basic Sciences, Insitituto Tecnológico del Putumayo, Mocoa 860001, Colombia; jorge.contreras@itp.edu.co

<sup>4</sup> Faculty of Sciences, Universidad Nacional of Colombia, Bogotá 111321, Colombia; rfierrom@unal.edu.co (R.F.M.); zriveram@unal.edu.co (Z.J.R.-M.); jaegarciaca@unal.edu.co (J.E.G.-C.)

\* Correspondence: claudia.parra@javeriana.edu.co

## Table of content

|                                                                                                                                                                                                                                             |   |
|---------------------------------------------------------------------------------------------------------------------------------------------------------------------------------------------------------------------------------------------|---|
| <b>Figure S1.</b> Mass spectrum of Chlorogenic Acid (peak 1).                                                                                                                                                                               | 2 |
| <b>Figure S2.</b> Mass spectrum of Rutin (peak 2)                                                                                                                                                                                           | 2 |
| <b>Figure S3.</b> Mass spectrum of Okanin-O-glucoside (peak 3)                                                                                                                                                                              | 3 |
| <b>Figure S4.</b> Mass spectrum of 3,4-di-Caffeoylquinic acid (peak 4)                                                                                                                                                                      | 3 |
| <b>Figure S5.</b> Mass spectrum of 3,5-di-Caffeoylquinic acid (peak 5)                                                                                                                                                                      | 4 |
| <b>Figure S6.</b> Mass spectrum of Okanin 4'-O-(diacetyl)-glucoside (peak 6)                                                                                                                                                                | 4 |
| <b>Figure S7.</b> Mass spectrum of peak 7                                                                                                                                                                                                   | 5 |
| <b>Figure S8.</b> Mass spectrum of peak 8                                                                                                                                                                                                   | 5 |
| <b>Figure S9.</b> Mass spectrum of Okanin 4'-O-(triacyl)-glucoside (peak 9)                                                                                                                                                                 | 6 |
| <b>Figure S10.</b> Mass spectrum of Okanin 4'-O-(triacyl)-glucoside isomer (peak 10)                                                                                                                                                        | 6 |
| <b>Figure S11.</b> Mass spectrum of peak 11                                                                                                                                                                                                 | 7 |
| <b>Table S1.</b> Synergy test of <i>B. pilosa</i> extract/Peptide combinations against <i>C. albicans</i> SC5314.                                                                                                                           | 7 |
| <b>Figure S12.</b> Cell viability assay of <i>C. albicans</i> SC5314 after treatment (48 h) with R-1-R, <i>B. pilosa</i> extract to MIC value, sub MIC values and combinations of peptide and extract where there was a synergistic effect. | 8 |
| <b>Figure S13.</b> Cell viability assay of <i>C. albicans</i> 256 after treatment (48 h) with R-1-R, <i>B. pilosa</i> extract to MIC value, sub MIC values and combinations of peptide and extract where there was additive effect.         | 9 |

**Figure S14.** Cell viability assay of *C. auris* 435 after treatment (48 h) with R-1-3i, *B. pilosa* extract to MIC value, sub MIC values and combinations of peptide and extract where there was synergistic effect..... 10

**Figure S15.** Cell viability assay of *C. auris* 537 after treatment (48 h) with R-1-R, *B. pilosa* extract to MIC value, sub MIC values and combinations of peptide and extract where there was synergistic effect. .... 11

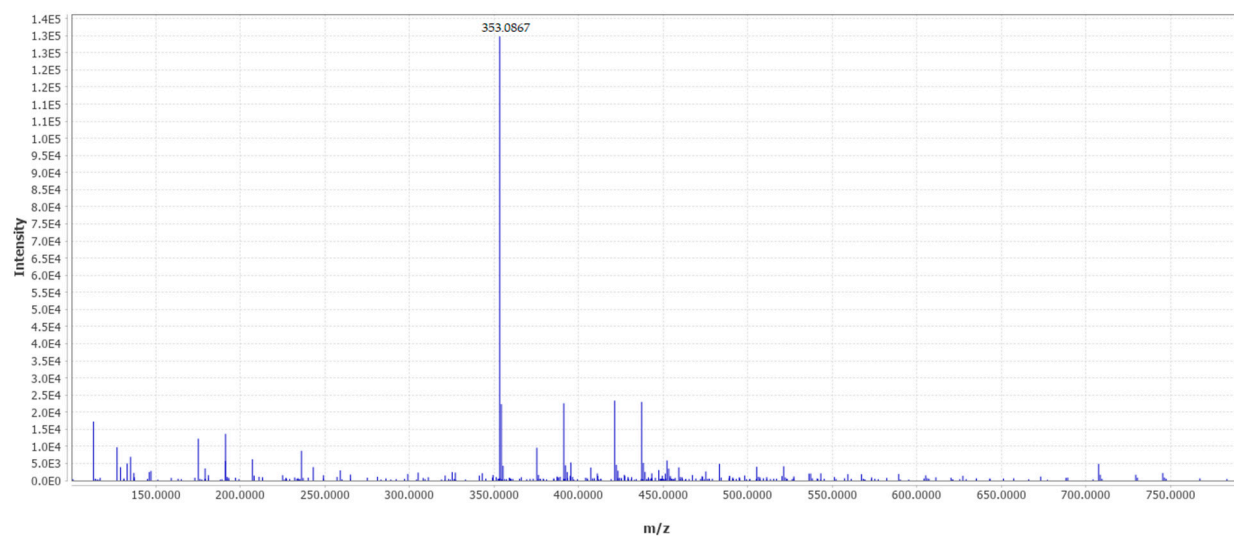

**Figure S1.** Mass spectrum of Chlorogenic Acid (peak 1).

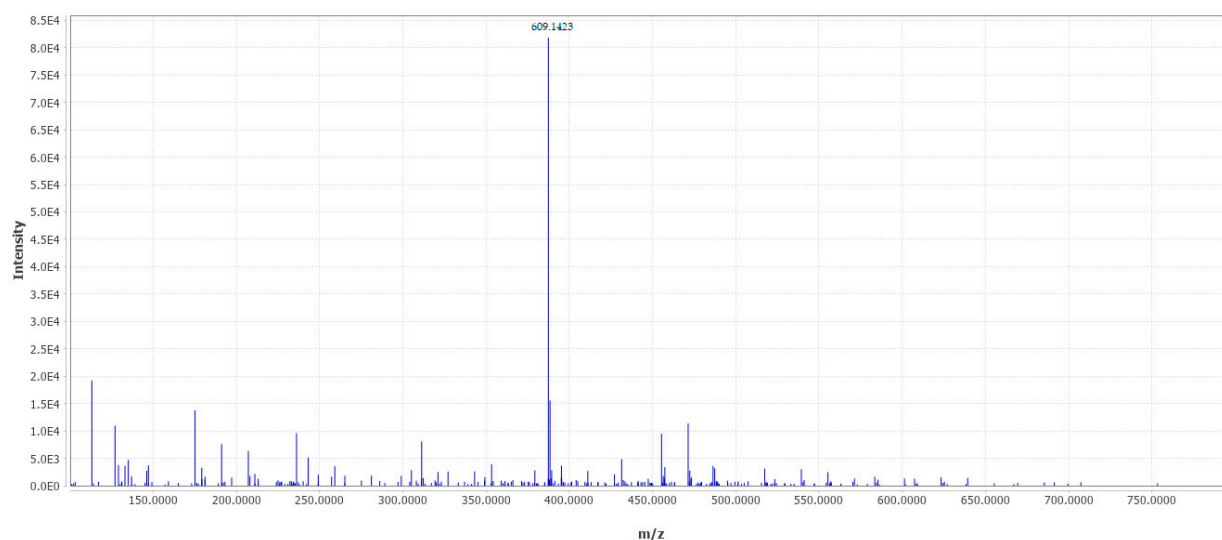

**Figure S2.** Mass spectrum of Rutin (peak 2)

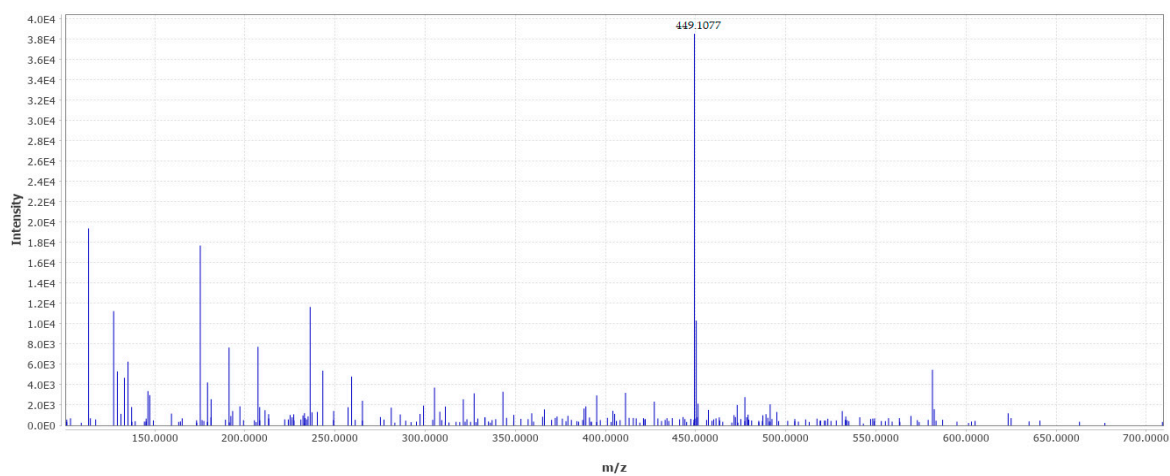

**Figure S3.** Mass spectrum of Okanin-O-glucoside (peak 3)

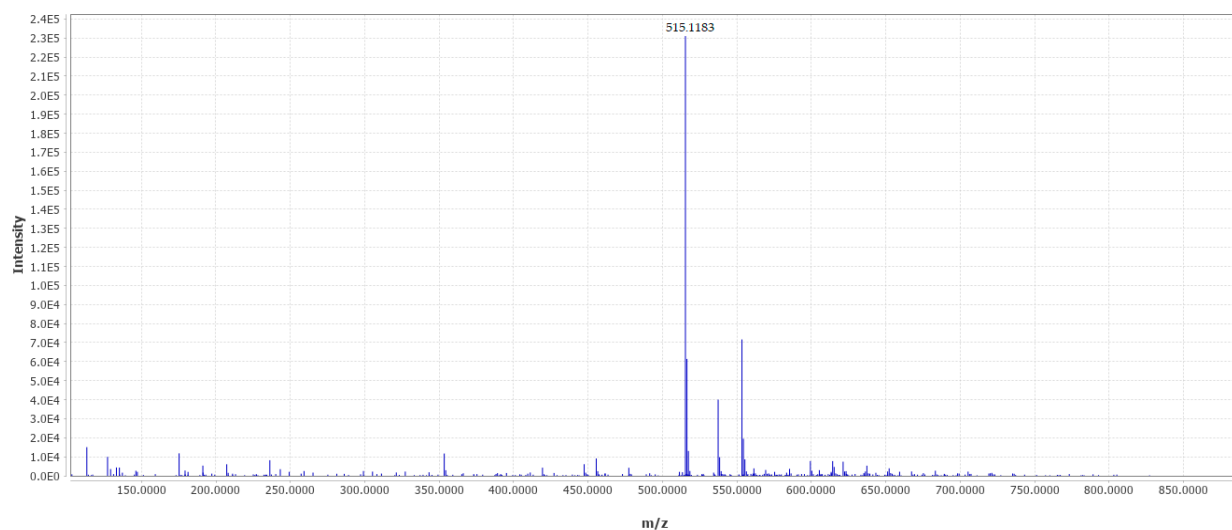

**Figure S4.** Mass spectrum of 3,4-di-Caffeoylquinic acid (peak 4)

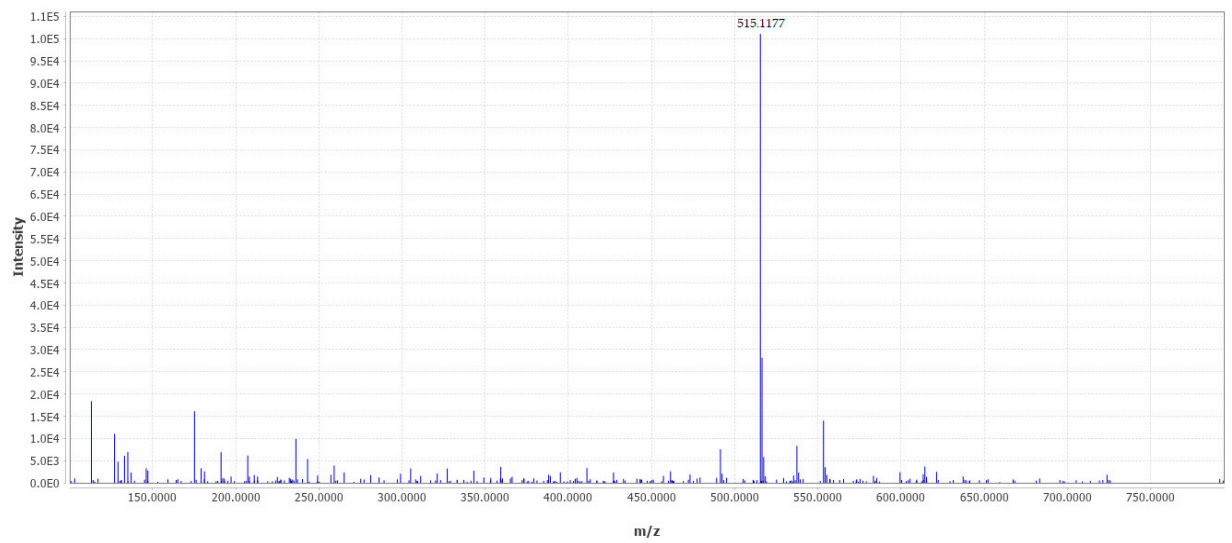

**Figure S5.** Mass spectrum of 3,5-di-Caffeoylquinic acid (peak 5)

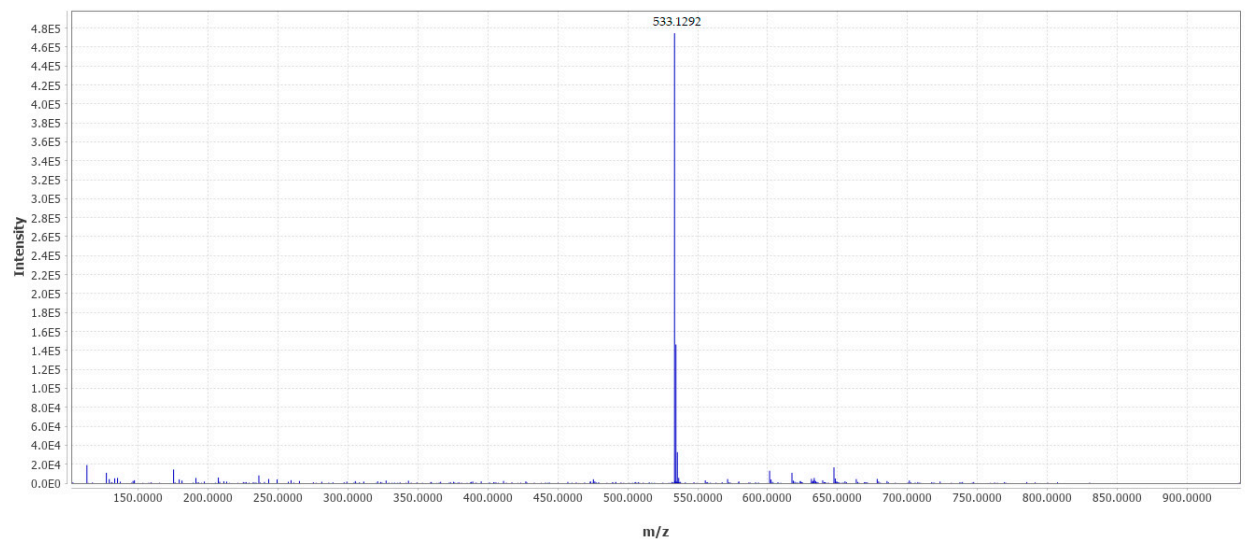

**Figure S6.** Mass spectrum of Okanin 4'-O-(diacetyl)-glucoside (peak 6)



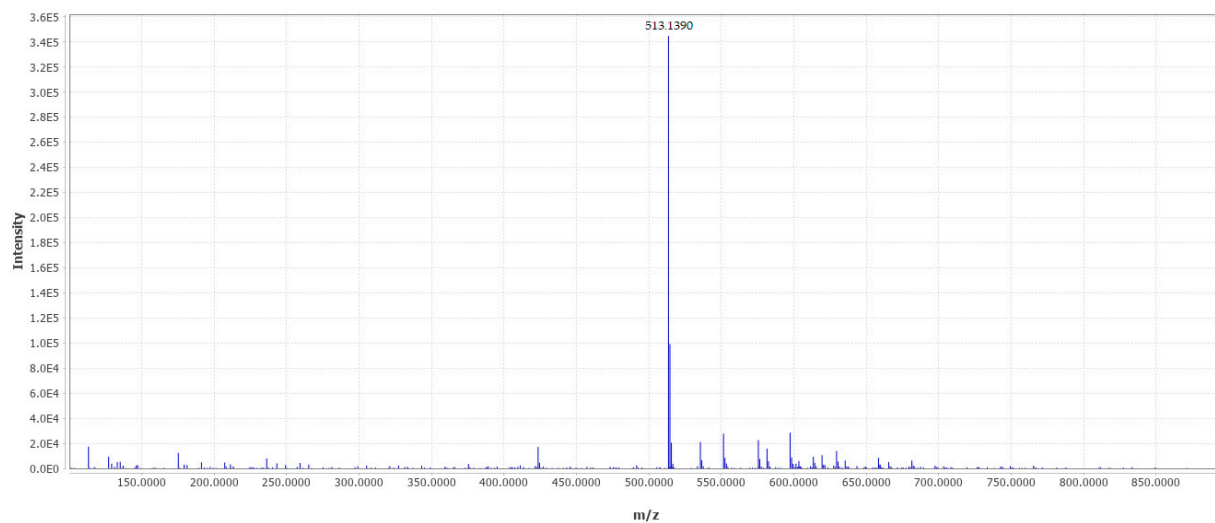

**Figure S7.** Mass spectrum of peak 7

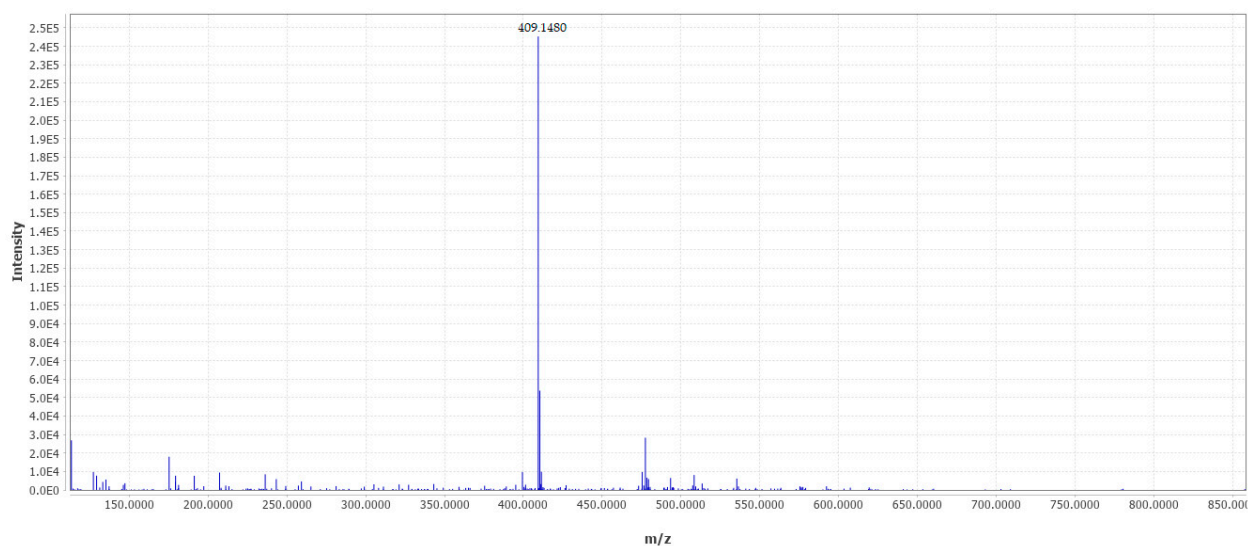

**Figure S8.** Mass spectrum of peak 8

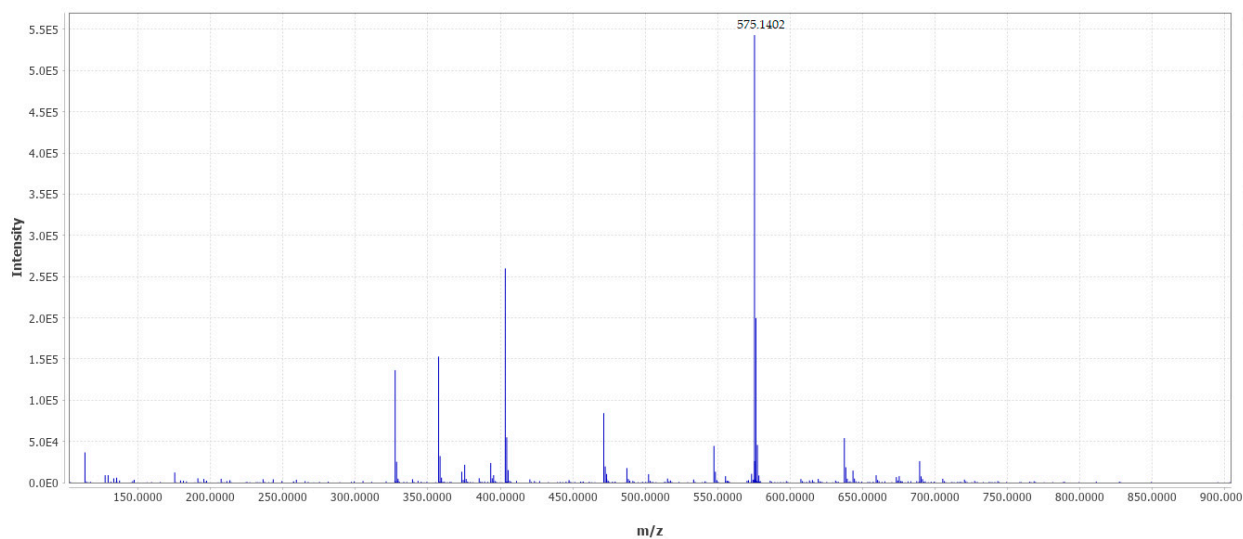

**Figure S9.** Mass spectrum of Okanin 4'-O-(triacetyl)-glucoside (peak 9)

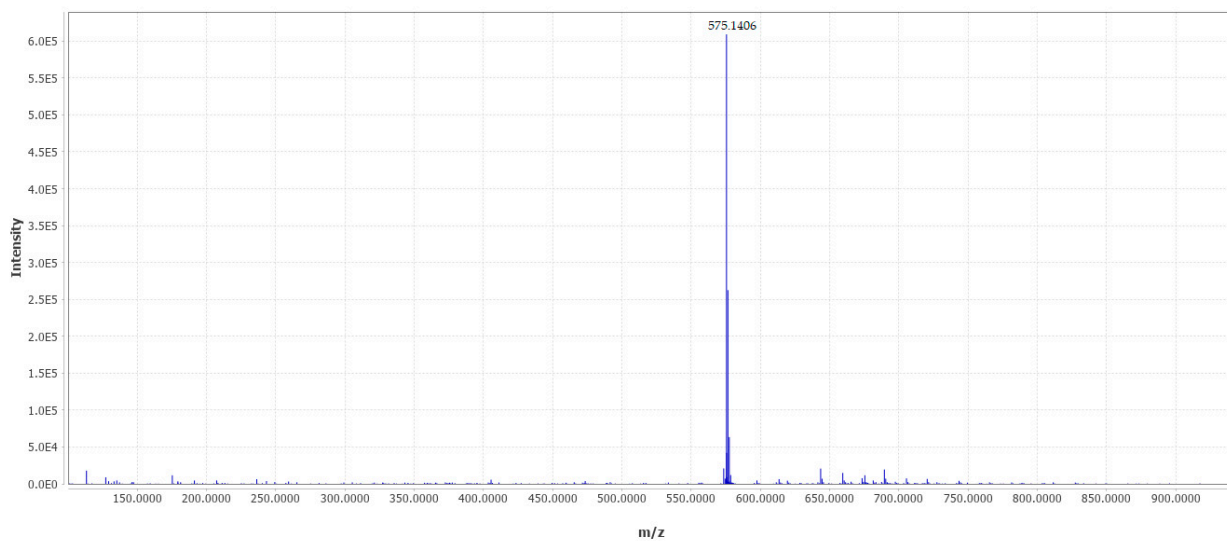

**Figure S10.** Mass spectrum of Okanin 4'-O-(triacetyl)-glucoside isomer (peak 10)

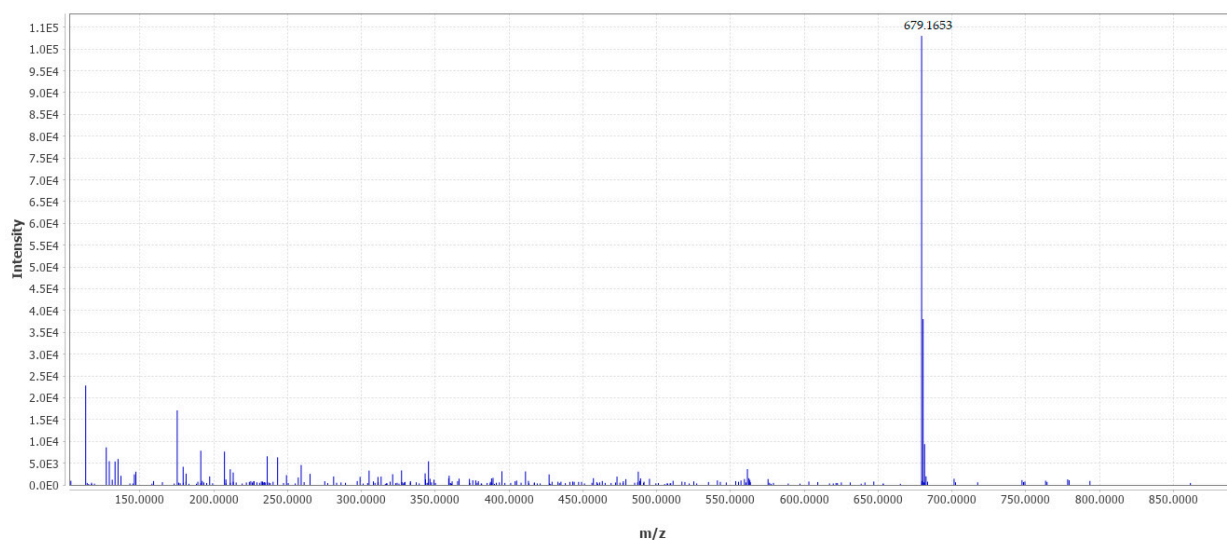

**Figure S11.** Mass spectrum of peak 11

**Table S1.** Synergy test of *B. pilosa* extract/Peptide combinations against *C. albicans* SC5314.

| Strain                       | Phenotype | Extract | Peptide                   | MIC <sub>E</sub> | MIC <sub>P</sub> | E    | P  | FIC Index | MIC <sub>E</sub> /E | MIC <sub>P</sub> /P |
|------------------------------|-----------|---------|---------------------------|------------------|------------------|------|----|-----------|---------------------|---------------------|
| <i>C. albicans</i><br>SC5314 | S         | 8.12    | R-1-R                     | 1000             | 100              | 250  | 25 | 0,50      | 4                   | 4                   |
|                              |           |         | [ <sup>3</sup> A]-R-1-R   | 1000             | 100              | 62,5 | 50 | 0,56      | 16                  | 2                   |
|                              |           |         | [ <sup>2</sup> A]-R-1-R   | 1000             | >200             | 62,5 | 50 | 0,31      | 16                  | 4                   |
|                              |           |         | RR-1-R                    | 1000             | 100              | 62,5 | 25 | 0,31      | 16                  | 4                   |
|                              |           |         | [ <sup>5</sup> Bpa]-R-1-R | 1000             | >200             | 62,5 | 50 | 0,31      | 16                  | 4                   |

MIC<sub>E</sub> and MIC<sub>P</sub> correspond to the MIC (μg/mL) of the extract of *B. pilosa* and peptides derived from R-1-R, respectively; E and P correspond to the MIC values when combining the extract and peptide. Minimum fractional concentration index (FIC I), MIC<sub>E</sub>/E, and MIC<sub>P</sub>/P represent the factor by which the extract or peptide are potentiated after being evaluated in combination, respectively.

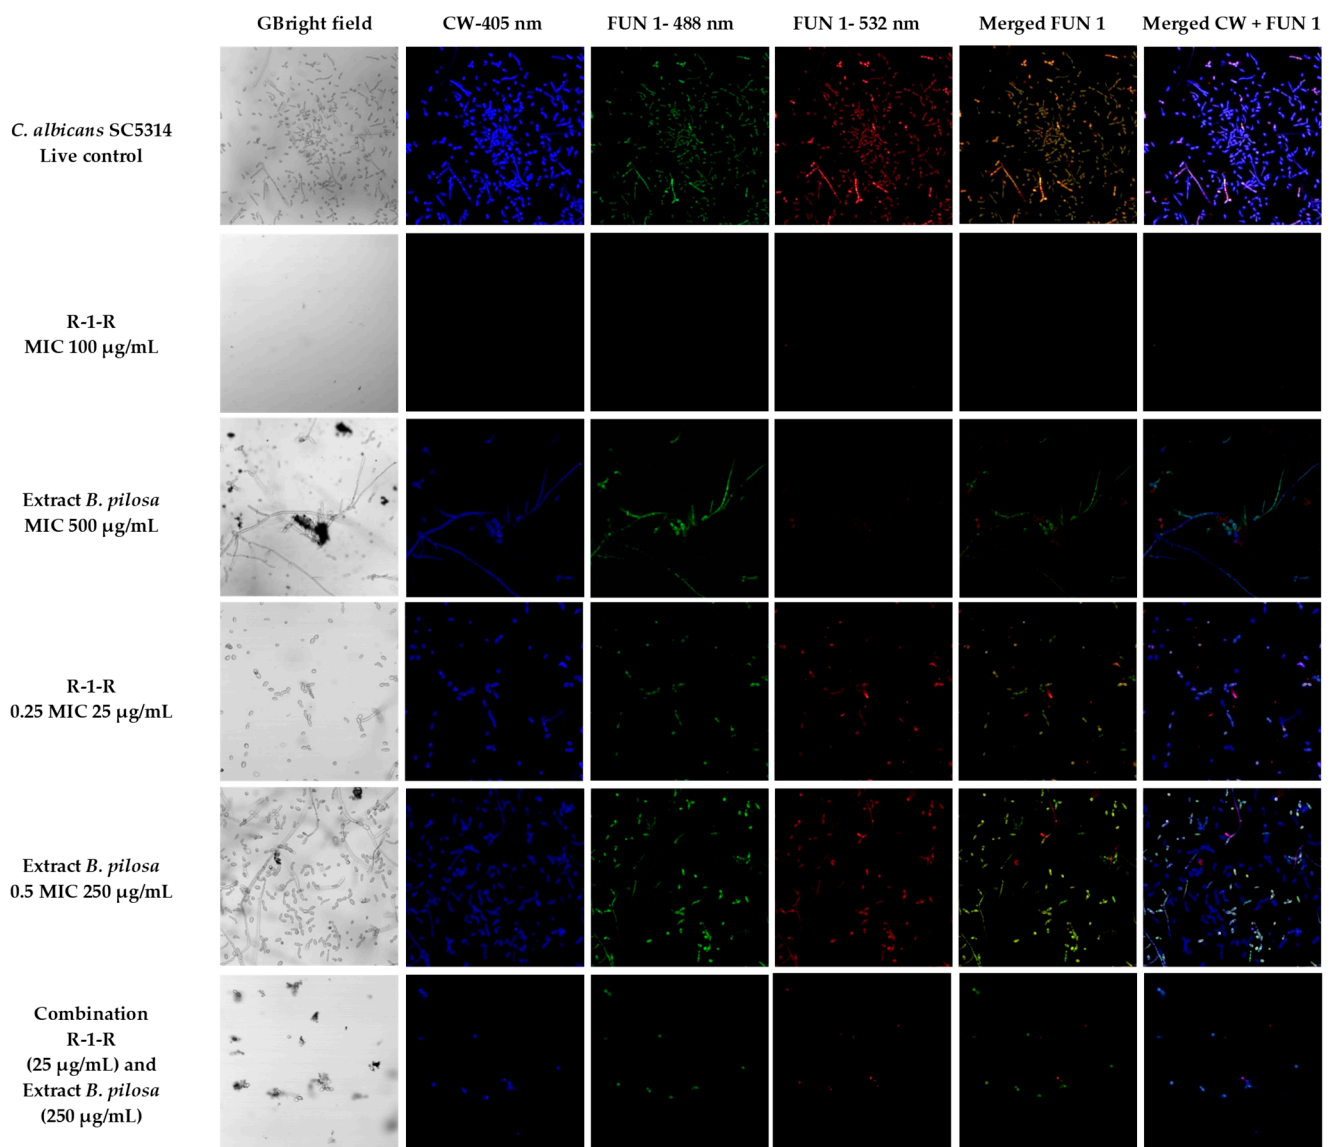

**Figure S12.** Cell viability assay of *C. albicans* SC5314 after treatment (48 h) with R-1-R, *B. pilosa* extract to MIC value, sub MIC values and combinations of peptide and extract where there was a synergistic effect.

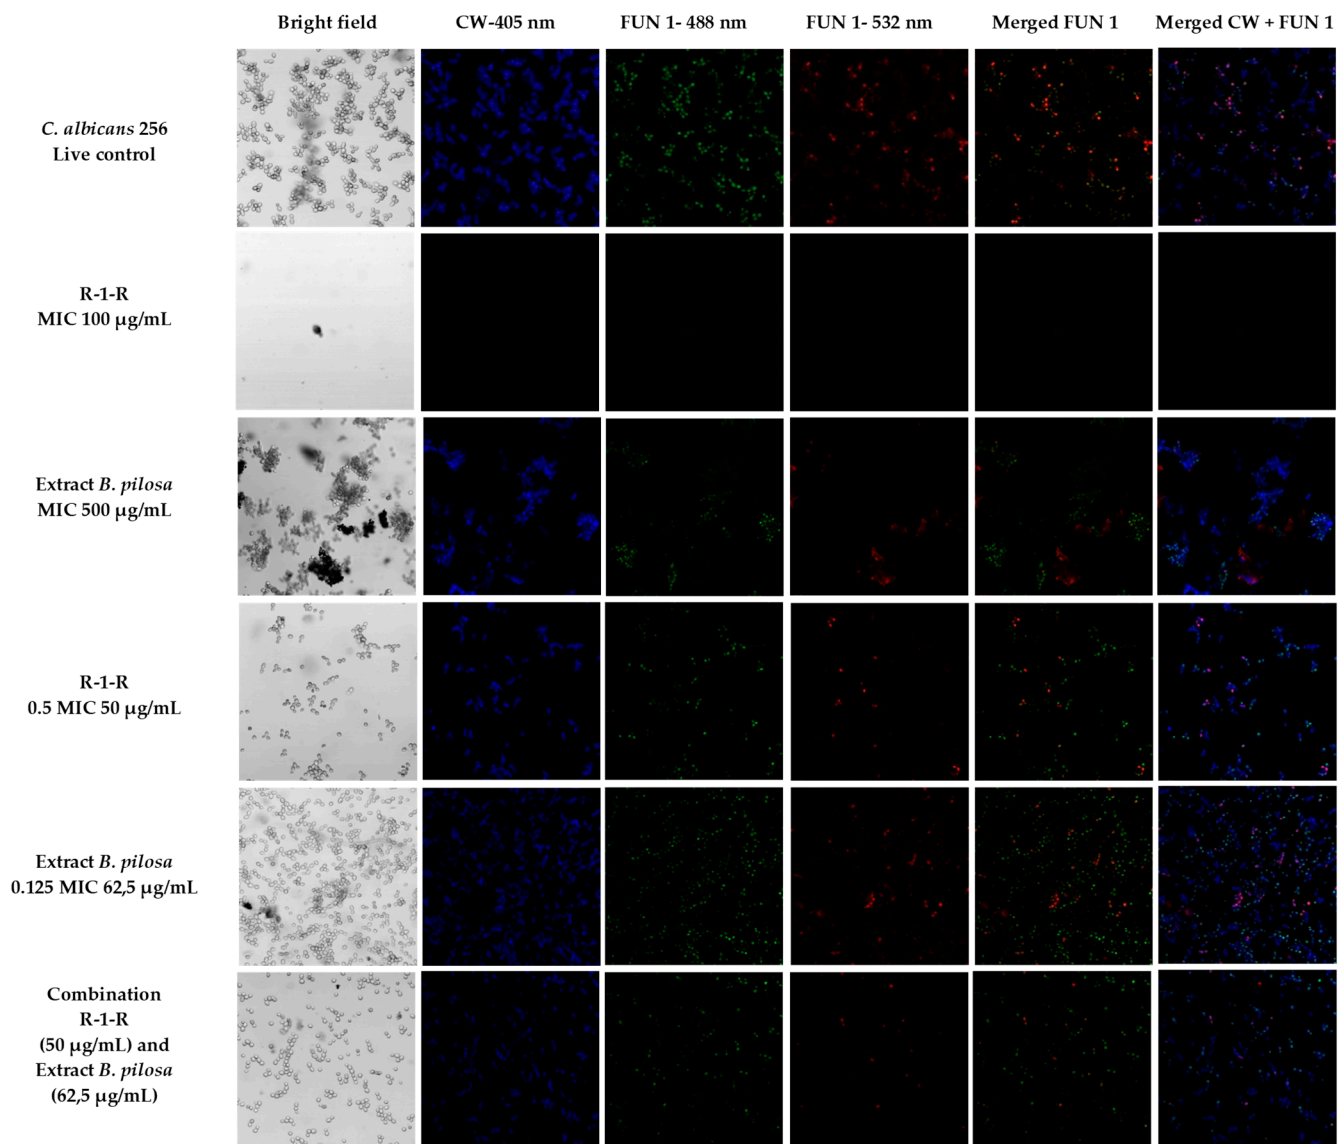

**Figure S13.** Cell viability assay of *C. albicans* 256 after treatment (48 h) with R-1-R, *B. pilosa* extract to MIC value, sub MIC values and combinations of peptide and extract where there was an additive effect.

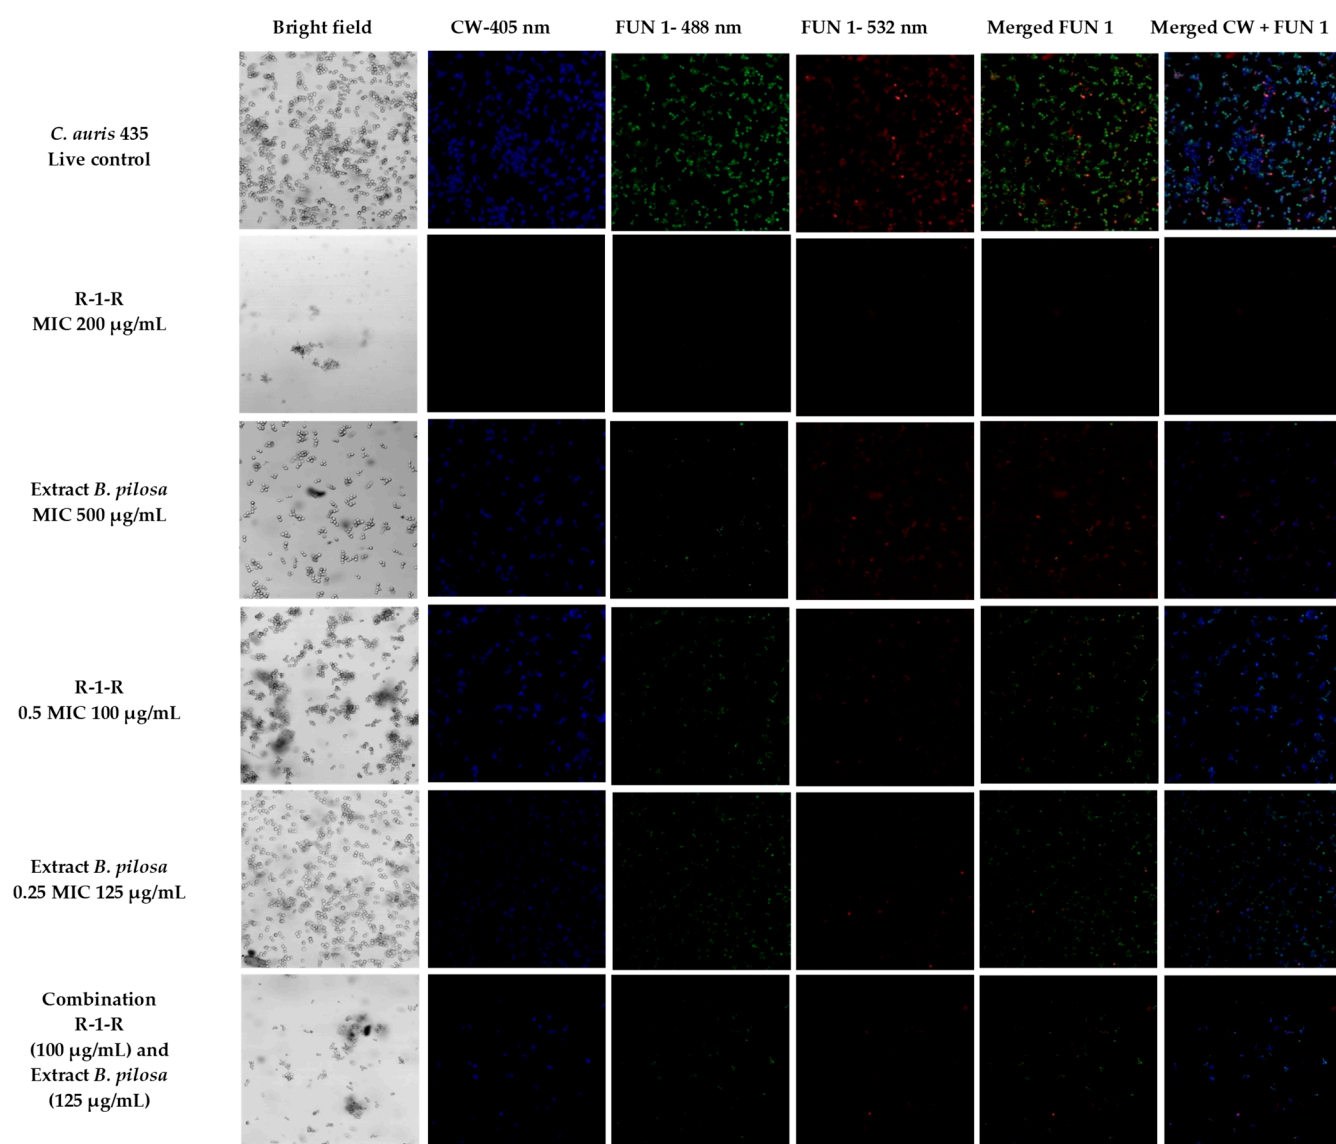

**Figure S14.** Cell viability assay of *C. auris* 435 after treatment (48 h) with R-1-R, *B. pilosa* extract to MIC value, sub MIC values and combinations of peptide and extract where there was a synergistic effect.

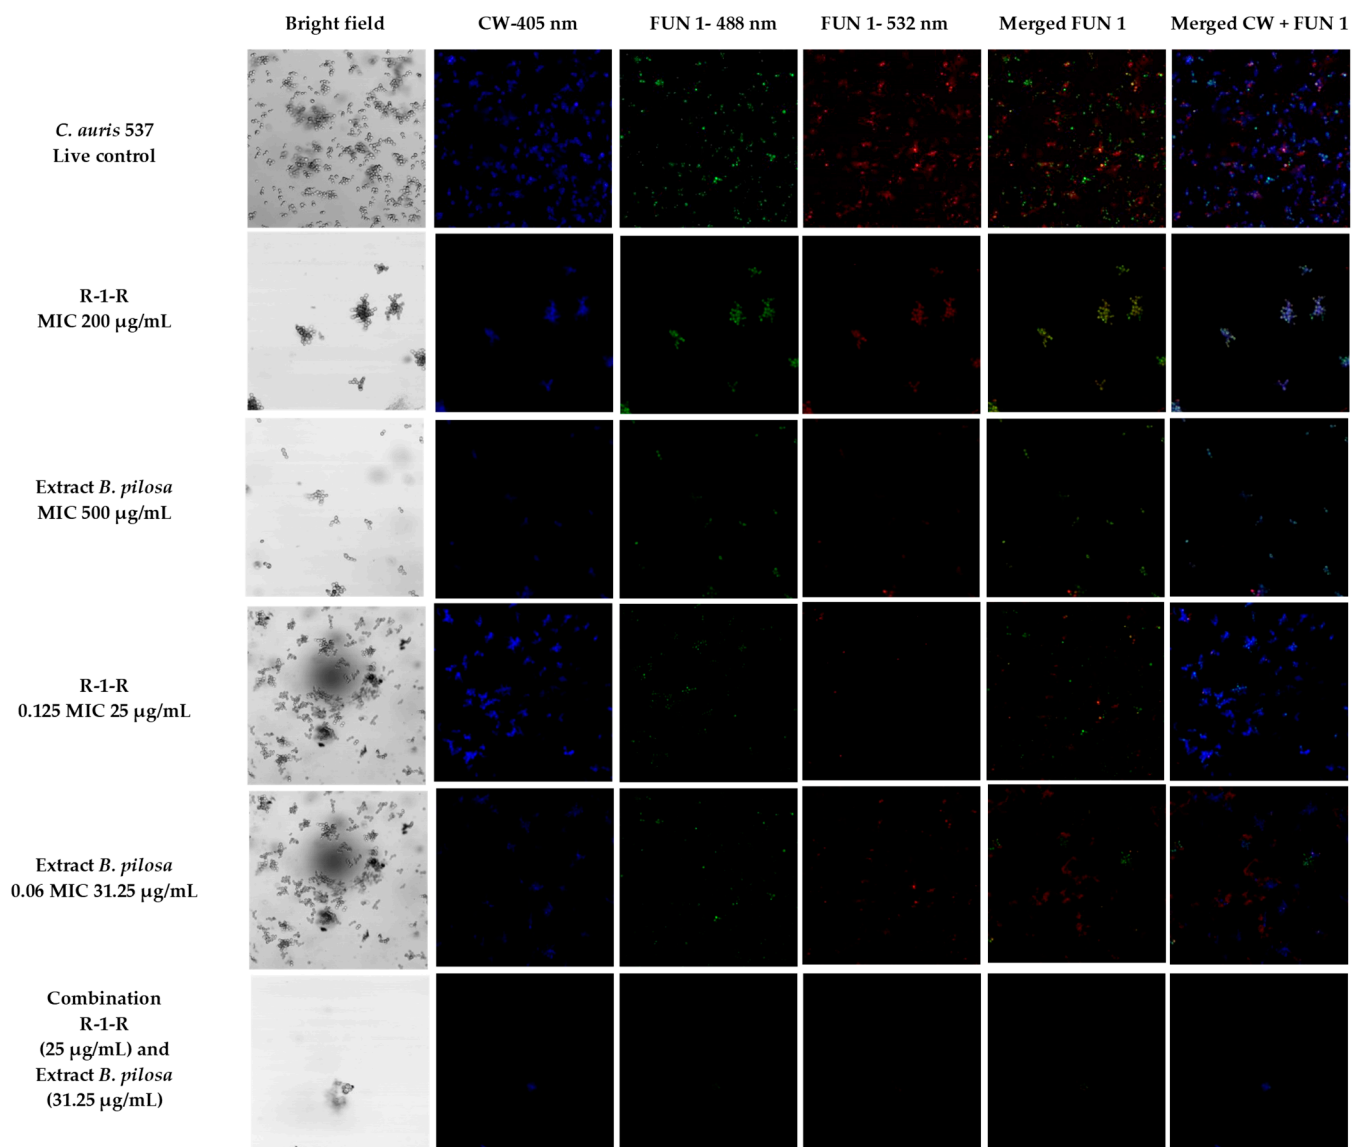

**Figure S15.** Cell viability assay of *C. auris* 537 after treatment (48 h) with R-1-R, *B. pilosa* extract to MIC value, sub MIC values and combinations of peptide and extract where there was a synergistic effect.
